# Supplementary figures and images for: Tunneling-nanotube direction determination in neurons and astrocytes
Source: PubMed Central journal article supplement — Cell Death Dis. 2012 Dec 6;3(12):e438–. doi: 10.1038/cddis.2012.177 (PMC3542613; doi:10.1038/cddis.2012.177), 2012-12-06

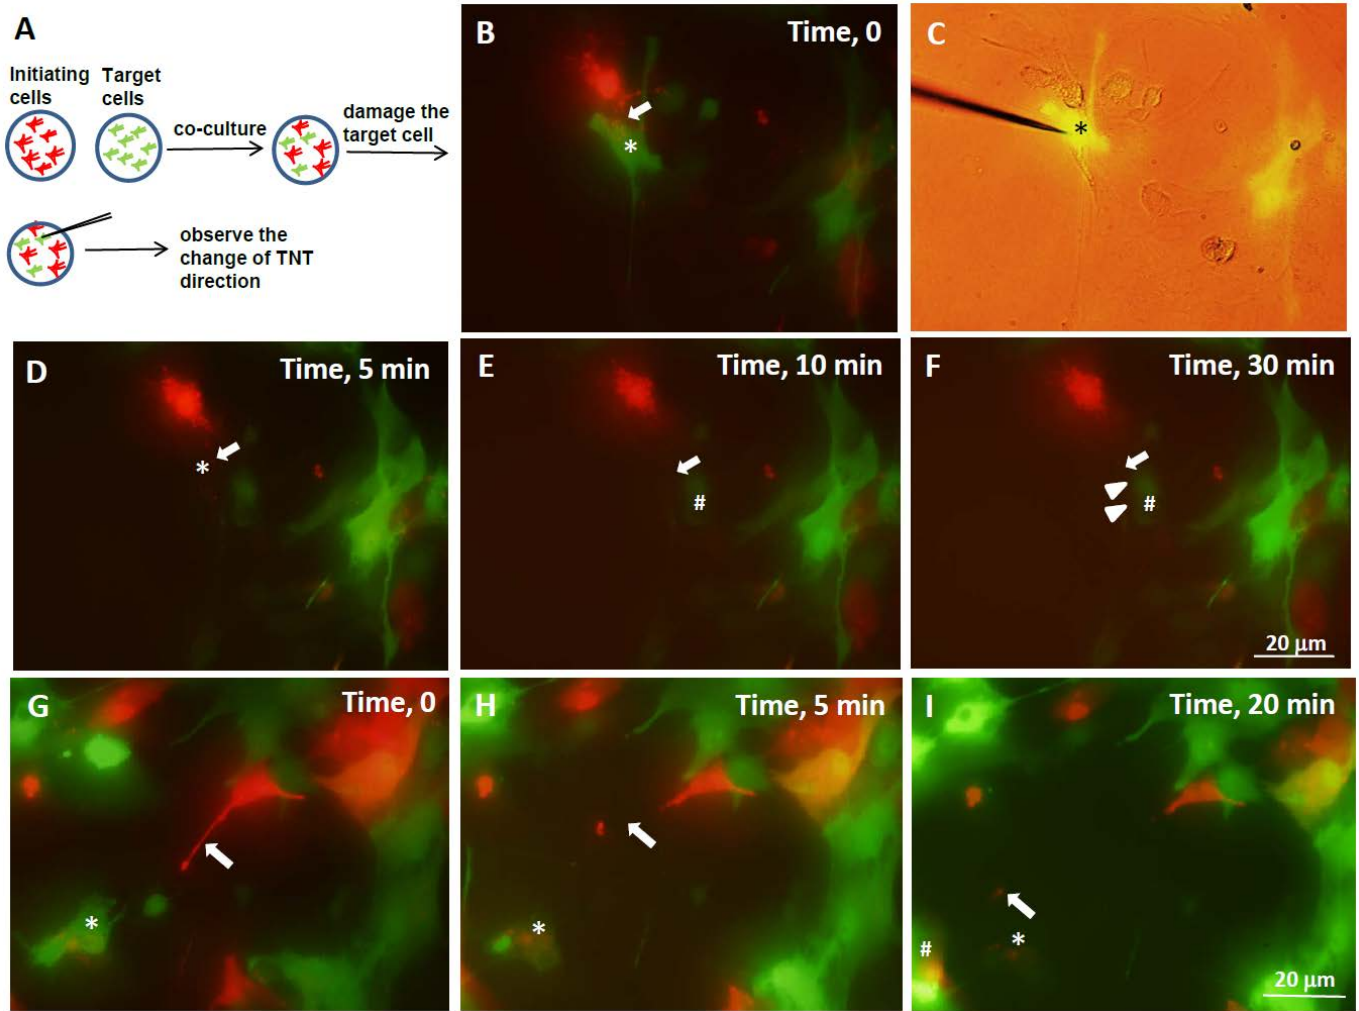

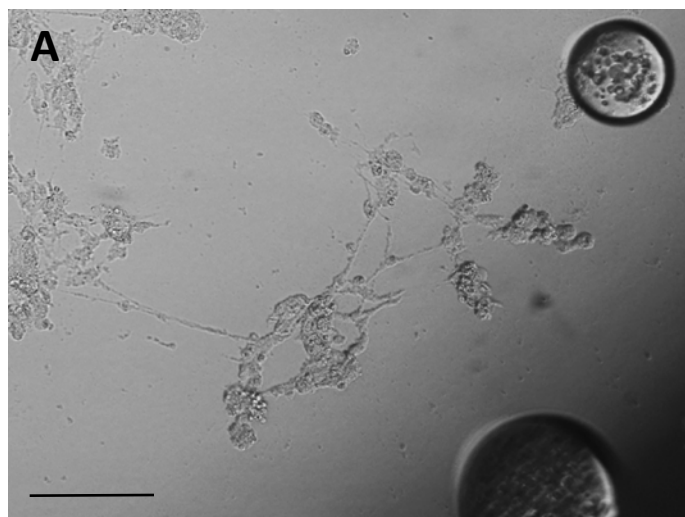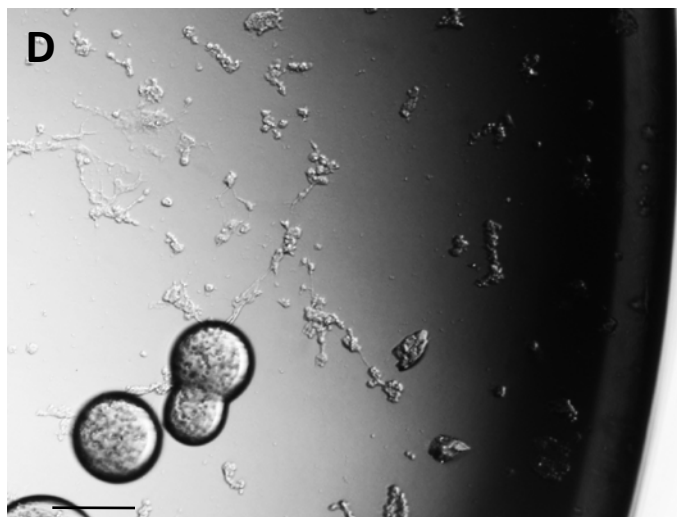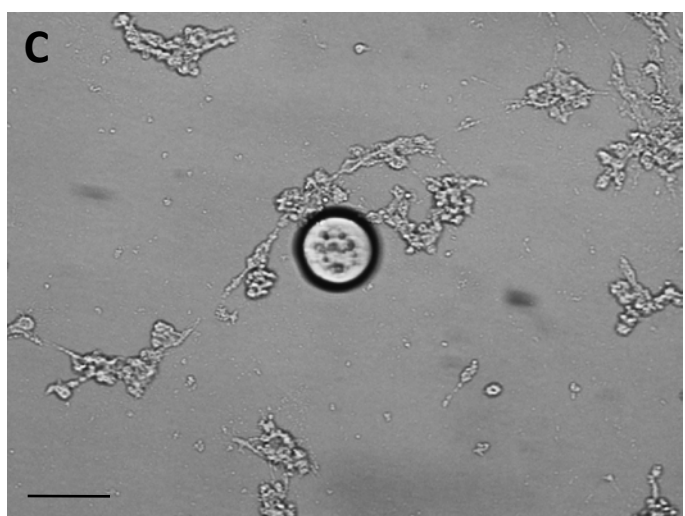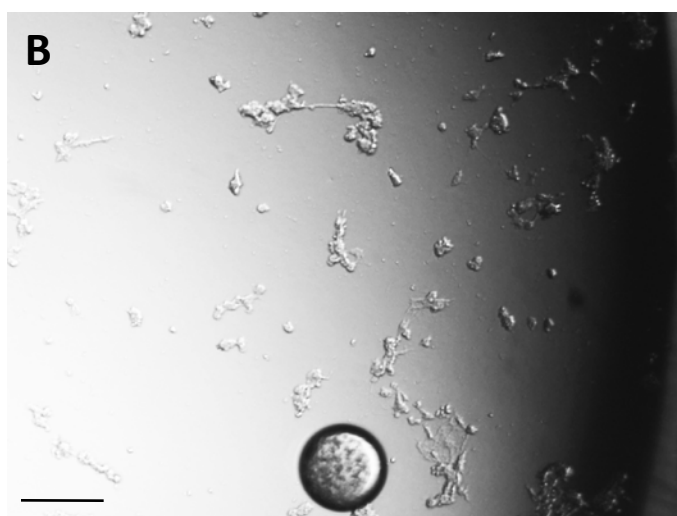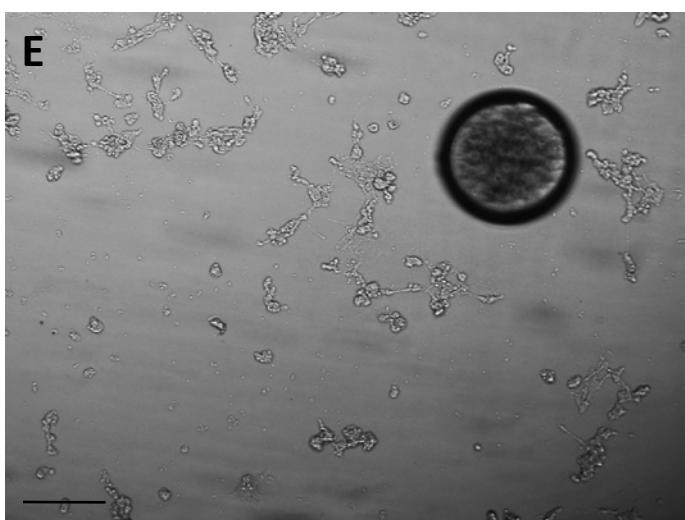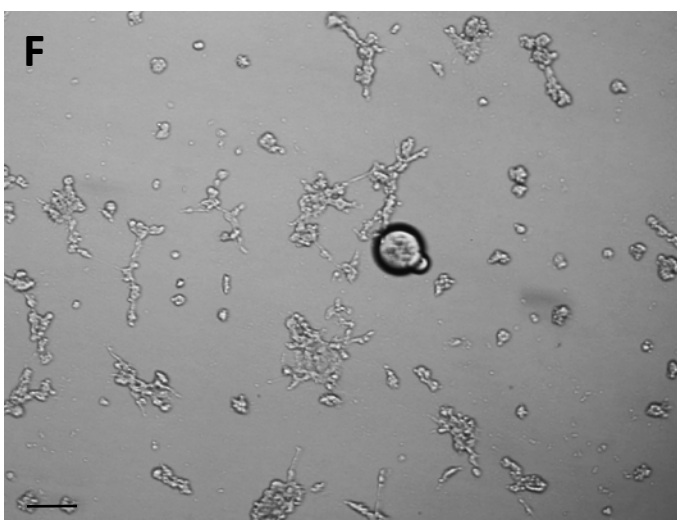

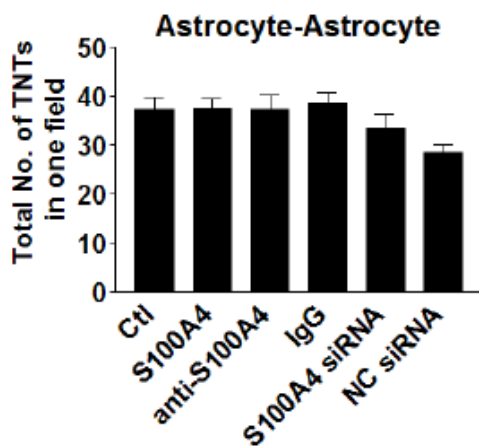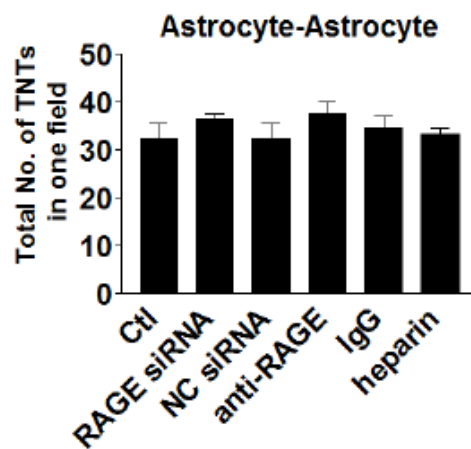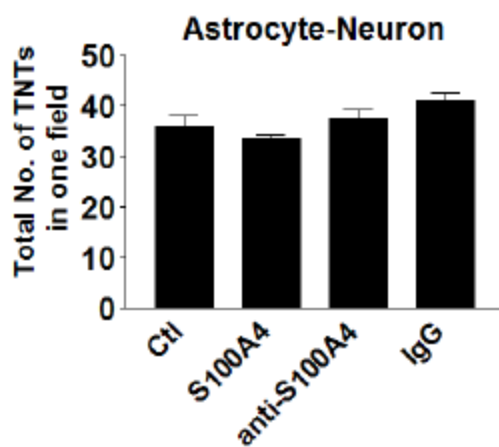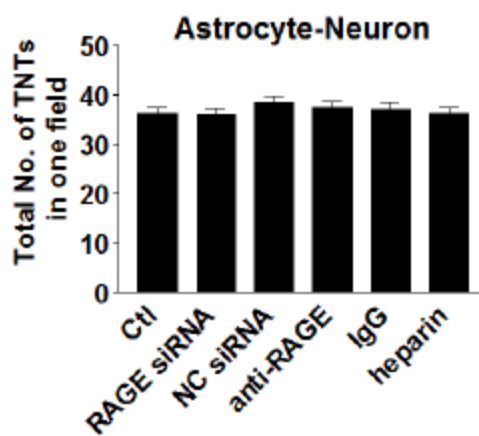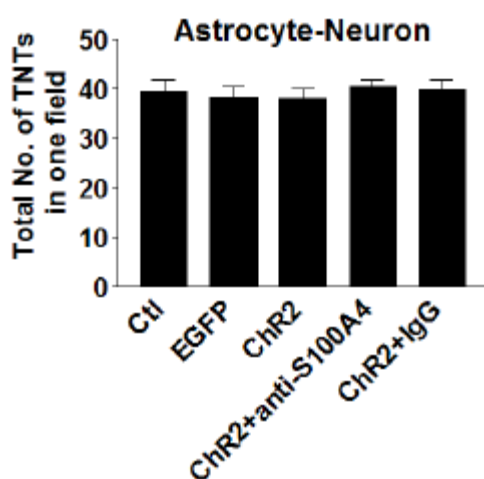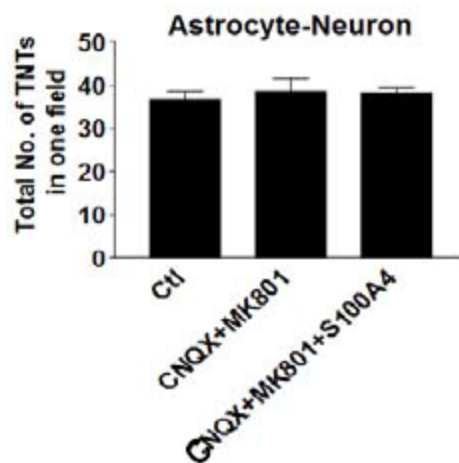

Supplement: cddis2012177x1.pdf [file cddis2012177x1.pdf]
